# Supplementary material for: Identifying and removing haplotypic duplication in primary genome assemblies
Source: PubMed Central journal article supplement (PMC7203741; doi:10.1093/bioinformatics/btaa025), 2020-01-23
Supplement: btaa025_supplementary_data.pdf [file btaa025_supplementary_data.pdf]

# Purge\_dups supplementary note

Dengfeng Guan<sup>1,2</sup>, Shane A. McCarthy<sup>2</sup>, Jonathan Wood<sup>3</sup>, Kerstin Howe<sup>3</sup>, Yadong Wang<sup>1</sup>, and Richard Durbin<sup>2,3</sup>

<sup>1</sup>Center for Bioinformatics, Harbin Institute of Technology, Harbin, 150001, China

<sup>2</sup>Department of Genetics, University of Cambridge, Cambridge, CB2 3EH, UK

<sup>3</sup>Wellcome Sanger Institute, Wellcome Genome Campus, Cambridge, CB10 1SA, UK

## Contents

|          |                                                 |          |
|----------|-------------------------------------------------|----------|
| <b>1</b> | <b>Supplementary Methods</b>                    | <b>1</b> |
| 1.1      | Read depth cutoffs calculation . . . . .        | 1        |
| 1.2      | Haplotypic duplication identification . . . . . | 1        |
| <b>2</b> | <b>Supplementary Data</b>                       | <b>2</b> |
| 2.1      | Datasets . . . . .                              | 2        |
| 2.2      | Software tools . . . . .                        | 2        |
| 2.3      | Purge_dups commands . . . . .                   | 3        |
| 2.4      | Analysis parameters . . . . .                   | 3        |
| <b>3</b> | <b>Supplementary Tables and Figures</b>         | <b>3</b> |

## 1 Supplementary Methods

### 1.1 Read depth cutoffs calculation

Given a read depth histogram  $H$ , purge\_dups calculates the read depth cutoffs with the following algorithm.

- Initially calculate differences  $H' = H_{i+1} - H_i$  of  $H$ , then smooth these using their 10 nearest neighbours to approximate the local derivative.
- Next, use the smoothed derivatives to find the turning points.
- Next we consider two cases: (1)  $\geq 2$  maxima are found, or (2) single maximum.
- In case (1) we first merge local maxima and minima (within 3 bins). If following this merging there remain two maxima with a minimum in between then we take the minimum  $v$  as the threshold between haploid and diploid, with interval  $(N, v]$  for haploid and  $(v, 3v]$  for diploid, where  $N$  is the noise cutoff, user-configurable with default value 5. Otherwise we take the highest remaining maximum and drop into case (2).
- For case (2) we decide whether this single peak at  $p$  represents haploid or diploid depth by comparing it to the mean read depth. If the peak occurs at below mean read depth we consider it to be haploid and set the intervals as  $(N, 1.5p]$  for haploid and  $(1.5p, 4.5p]$  for diploid. If the peak is above the mean read depth then we take  $(N, 0.75p]$  for haploid and  $(0.75p, 2.25p]$  for diploid.

Purge\_dups outputs the thresholds calculated, and also the particular decision process applied, including for the single peak case the peak and mean depths. When the mean is sufficiently far from the peak this works well, but when they are close, for example with very low heterozygosity samples, it can make a mistake. An assembly pipeline can therefore inspect this information and choose to flag marginal decisions for manual oversight. In case a user wants to change the default, there is a command line option to force treatment of the peak depth as either haploid or diploid according to the user's choice.

### 1.2 Haplotypic duplication identification

Given a matching set of all versus all self alignments from minimap2, and read depth cutoffs from the previous section, purge\_dups uses the following steps to identify the haplotypic duplications in a draft primary assembly:

1. Contained haplotig identification: `purge_dups` uses essentially the same way as `purge_haplotigs` to detect the contained haplotigs. If more than 80% bases of a contig are above the high read depth cutoff or below the noise cutoff, it is binned into the potential junk bin. Otherwise if more than 80% bases are in the diploid depth interval it is labelled as a primary contig, otherwise it is considered further as a possible haplotig. Next for each possible haplotig, we consider its best alignment to another contig. If its alignment score is larger than  $s$  (default 70) and max match score larger than  $m$  (default 200), it is marked as a repeat and is placed in the haplotig bin; if the alignment score is larger than  $s$  and max match score not larger than  $m$ , it is marked as a haplotig and also placed in the haplotig bin. Otherwise it is left as a candidate primary contig.
  2. Haplotypic overlap identification: after purging the junk and contained haplotigs, `purge_dups` chains the matches between remaining candidate primary contigs to find collinear matches with the following process (Supplementary Figure 5):
    - i Given all matches between contig  $Q$  and contig  $T$ , `purge_dups` builds a direct acyclic graph (DAG) with the matches as vertices. Each vertex  $V_i$  in DAG is denoted as a tuple  $(s, e, h, t, d, m)$ , where  $s$  and  $e$  are the start and end position on  $Q$ ,  $h$  and  $t$  are the start and end position on  $T$ ,  $d$  is the orientation and  $m$  is the number of matched bases.
    - ii all vertices are ordered by their start positions on  $Q$ . For a pair of  $(V_i, V_j)$ , suppose without loss of generality that  $V_i$  is a predecessor of  $V_j$  they are both aligned in the forward direction, and the overlap between  $V_i$  and  $V_j$  on  $Q$  is represented by  $Q_{i,j}^o$ , and on  $T$  is  $T_{i,j}^o$ . An edge exists between  $V_i$  and  $V_j$  if they meet the following conditions:
$$\begin{cases} V_i^e < V_j^e, V_i^t < V_j^t, \max(V_j^s - V_i^e, V_j^h - V_i^t) < g \\ Q_{i,j}^o / \min(V_j^e - V_j^s, V_i^e - V_i^s) < 0.95 \\ T_{i,j}^o / \min(V_i^t - V_i^h, V_j^t - V_j^h) < 0.95 \end{cases} \quad (1)$$

Where  $g$  is the maximum allowed gap size. Once the DAG is built, `purge_dups` will find the local optimal path by dynamic programming using the following recurrence equation:

$$S(j) = \max\{S(i) + V_j^m\}, V_i \in \text{predecessors}(V_j) \quad (2)$$

where  $S_j$  is the score of  $V_j$ .

  - iii After merging all the collinear matches, `purge_dups` filters out all the nested matches and matches whose score is less than a threshold  $l$  (default: 10,000).
3. Calculate average read depth for the matching intervals in both the query and target, and only keep matches both of whose average read depths are below the diploid cutoff. Remove secondary and overlapping matches, defined as those for which the query region is contained within less than 85% of the matching region of another match from the same query, or no more than 85% of its sequence overlaps with another match. For remaining matches, move the sequence corresponding to the matching interval of the shorter contig into the haplotigs bin.

## 2 Supplementary Data

### 2.1 Datasets

Datasets used in the experiments are listed as follows:

- **At:** We used the same assemblies for *Arabidopsis thaliana* as used in the `purge_haplotigs` paper, available at <https://zenodo.org/record/1419699>. SRA accessions for Pacbio reads are SRR3405291-SRR3405298 and SRR3405300-SRR3405326, and for paired-end Illumina reads are SRR3703081, SRR3703082, SRR3703105.
- **Ac:** The draft *Anopheles coluzzii* primary assembly that we used is available at <https://drive.google.com/open?id=18osbKP0iUDWi65R5hpdzbzNpGRgUtsJQy>, the accession ID of the raw Pacbio reads is SRR8291675, and the RefSeq Accession ID of the AgamP4 PEST assembly for *Anopheles gambiae* is GCA\_000005575.2.
- **Vv:** We used the same assemblies for *Vinua vinera* as used in the `purge_haplotigs` paper, available at <https://zenodo.org/record/1419699>, the accession IDs of the raw Pacbio reads are SRR3321323 and SRR3321342-SRR3321414.
- **Mm:** The draft Pacbio primary assembly is available at [s3://genomeark/species/Myripristis\\_murdjan/fMyrMur1/assembly\\_cambridge/intermediates/falcon\\_unzip/fMyrMur1.PB.asm1.unzip.primary.fa.gz](s3://genomeark/species/Myripristis_murdjan/fMyrMur1/assembly_cambridge/intermediates/falcon_unzip/fMyrMur1.PB.asm1.unzip.primary.fa.gz). The reference genome accession ID is GCF\_902150065.1. All the sequencing data are available in ENA with the sample id SAMEA4872133.

### 2.2 Software tools

The following software tools were used in the experiments:

| Tools            | Version | Usage                                   | Source                                                                                                          |
|------------------|---------|-----------------------------------------|-----------------------------------------------------------------------------------------------------------------|
| purge_dups       | V0.0.3  | automatic haplotigs and overlaps purger | <a href="https://github.com/dfguan/purge_dups">https://github.com/dfguan/purge_dups</a>                         |
| purge_haplotigs  | V1.0.4  | semi-automatic haplotigs purger         | <a href="https://bitbucket.org/mroachawri/purge_haplotigs">https://bitbucket.org/mroachawri/purge_haplotigs</a> |
| BUSCO            | V3.1.0  | genome assembly assessment tool         | <a href="https://gitlab.com/ezlab/busco">https://gitlab.com/ezlab/busco</a>                                     |
| KMC <sup>1</sup> | -       | K-mer coverage plot tool                | <a href="https://github.com/dfguan/KMC">https://github.com/dfguan/KMC</a>                                       |
| cgplot           | -       | Dotplot script                          | <a href="https://github.com/dfguan/cgplot">https://github.com/dfguan/cgplot</a>                                 |

**1:** modified from a k-mer counting tool **KMC** published in Kokot, M., Dlugosz, M., and Deorowicz, S. (2017). KMC 3: counting and manipulating k-mer statistics. *Bioinformatics*, 33(17):2759-2761.

## 2.3 Purge\_dups commands

Given raw Pacbio reads alignment PAF files *pfs*, and a primary assembly *asm*, *purge\_dups* uses the following commands to identify the haplotigs and overlaps:

```

pbccstat $pfs // generates files PB.base.cov for base-level read depth and PB.stat for read depth histogram
calcults PB.stat > cutoffs 2> calcults.log
split_fa $asm > $asm.split.fa
minimap2 -xasm5 -DP $asm.split.fa $asm.split.fa > $asm.split.self.paf
purge_dups -2 -T cutoffs -c PB.base.cov $asm.split.self.paf > dups.bed 2> purge_dups.log
get_seqs dups.bed $asm > purged.fa 2> hap.fa

```

## 2.4 Analysis parameters

Read depth cutoffs for *purge\_haplotigs* were set manually and are shown here together with the databases used for BUSCO analysis:

| Assembly | purge_haplotigs read depth cutoffs (low/middle/high) | BUSCO database |
|----------|------------------------------------------------------|----------------|
| At       | 25/97/250                                            | embryophyta    |
| Ac       | 10/150/700                                           | diptera        |
| Mm       | 5/42/125                                             | actinopterygii |
| Vv       | 25/103/190                                           | embryophyta    |

## 3 Supplementary Tables and Figures

| Assembly | Heterozygosity (%) | Genome size (Mbp) |
|----------|--------------------|-------------------|
| At       | 1.04               | 135               |
| Ac       | 0.61               | 262               |
| Mm       | 1.06               | 847               |
| Vv       | 1.58               | 475               |

Supplementary Table 1: Heterozygosity and genome size estimates calculated by GenomeScope. For At and Mm these are from Illumina data and for Ac and Vv from PacBio CCS HiFi data.

|          | N50 (Mb) | NG50 (Mb) | NGA50 (Mb) | # Contig misassemblies | # Scaffold misassemblies |
|----------|----------|-----------|------------|------------------------|--------------------------|
| Mm-origS | 4.88     | 6.96      | 3.46       | 5868                   | 384                      |
| Mm-PDS   | 23.78    | 23.78     | 16.73      | 311                    | 22                       |
| Mm-PHS   | 8.17     | 8.51      | 3.83       | 1102                   | 178                      |
| Mm-HMS   | 26.79    | 26.79     | 7.38       | 1699                   | 115                      |
| Mm-HMmS  | 34.53    | 34.53     | 7.86       | 1937                   | 126                      |

Supplementary Table 2: Scaffold N50, NG50, NGA50 measured by QUAST using the reference genome.

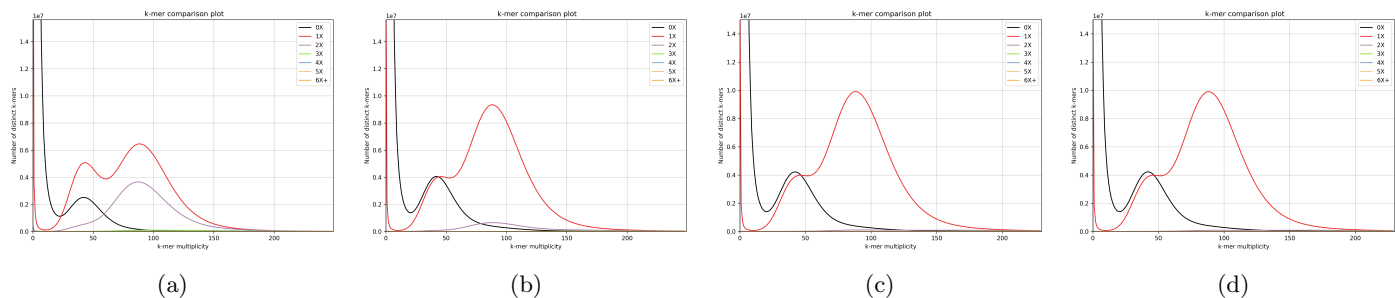

Supplementary Figure 1: **K-mer coverage plots for draft and purged Mm assemblies (k=21)**. The horizontal axis represents the copy number of k-mers in short reads from the same sample, the vertical axis shows the number of distinct k-mers, and the colored lines denote k-mers which occur the given number of times in the assembly. (a) The purple line shows 209.1 million 2-copy k-mers accumulating in the haploid and diploid areas, which correspond to duplicated haplotigs or overlaps in the primary assembly. (b) 39.3 million 2-copy k-mers remain after purging with `purge_haplotigs`. (c) 9.0 million 2-copy k-mers remain after processing with HaploMerger. (d) Only 7.6 million 2-copy k-mers remain after purging with `purge_dups`.

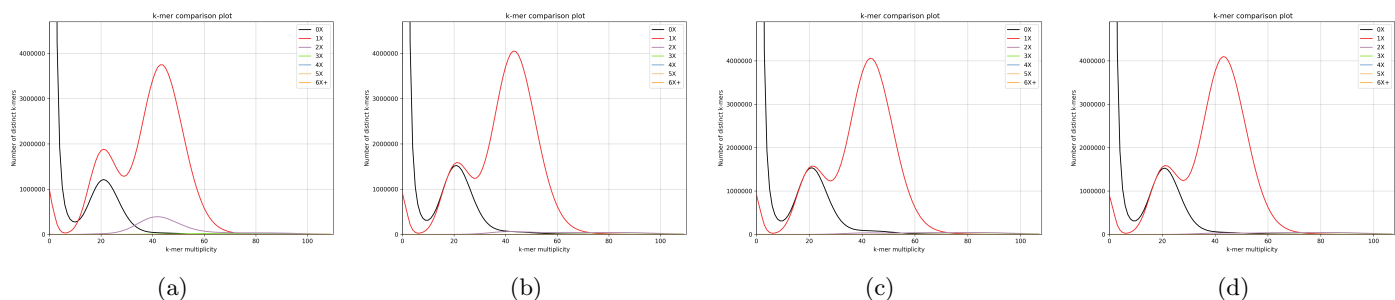

Supplementary Figure 2: **K-mer coverage plots for the At primary and purged assemblies (k=21)**. (a): 8.06 million 2-copy k-mers remain in the diploid area of the original assembly (purple line). (b): 1.56 million remain after `purge_haplotigs`. (c): 1.02 million remain after HaloMerger. (d): 0.94 million remain after `purge_dups`. We can not make this plot for assembly Ac because we do not have Illumina data from the same sample.

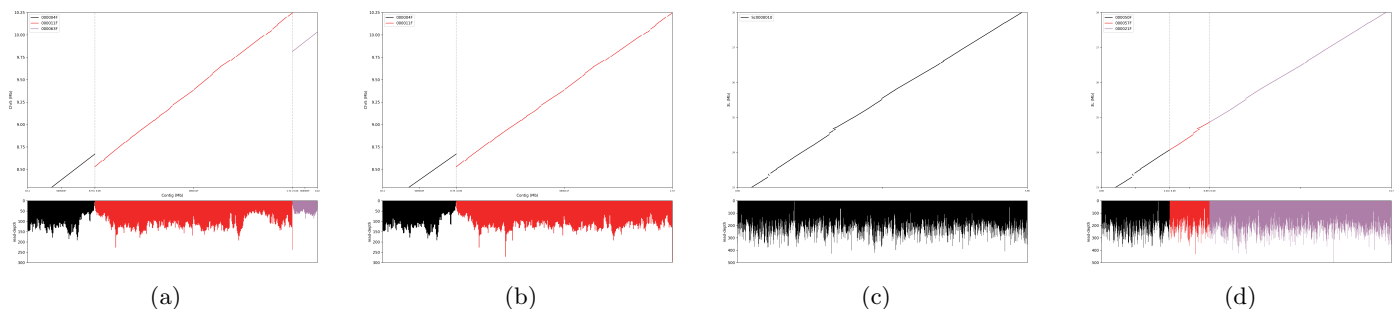

Supplementary Figure 3: **Dotplots of draft and purged At assemblies mapped to the TAIR10 reference genome**. The horizontal axis represents the contigs in the assemblies, the upper vertical axis represents the reference chromosome, and the lower one shows the read depth for the contigs. (a) In the draft assembly, the right end of contig "000004F" and all of contigs "000011F" and "000063F" are aligned to part of chromosome 5. Contig "000063F" is contained in "000011F" and an overlap occurs at the ends of "000011F" and "000004F". The read depth at the haplotypic and overlapped region drops to almost half of the diploid read depth (150). (b) In the `purge_haplotigs` assembly, the haplotig is removed, and read depth at the haplotypic region goes back to diploid read depth. However the overlap remains. (c) In the HaploMerger assembly, both the haplotigs and overlaps are removed, and the read depth goes back to normal. (d) In the `purge_dups` assembly, both the haplotig and the overlap are removed and read depth goes back to normal across the whole range.

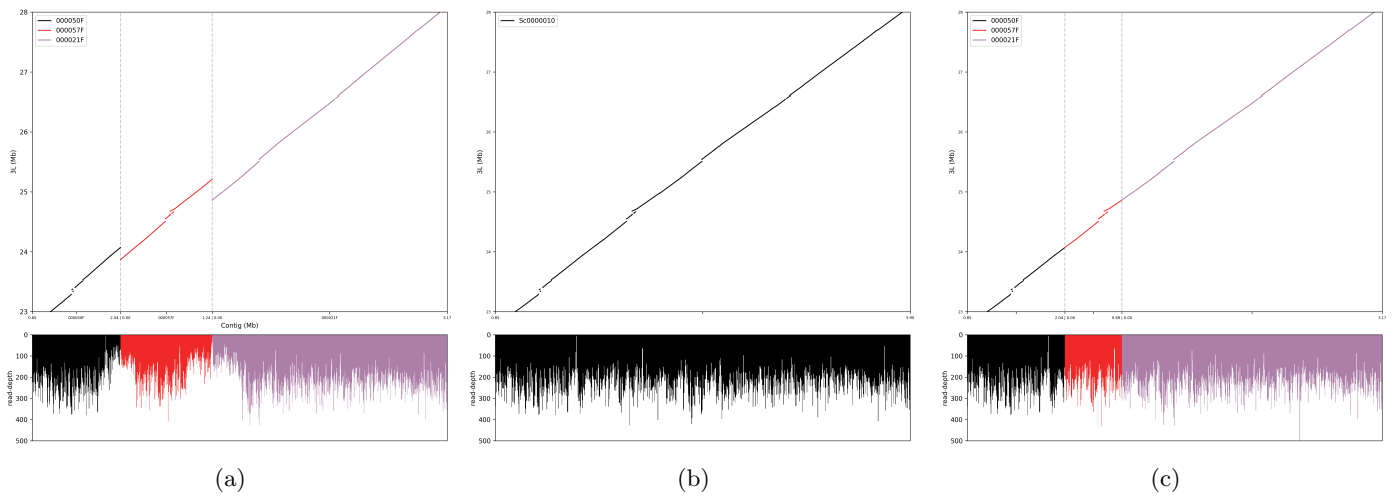

Supplementary Figure 4: **Dotplots on Ac draft primary and purge\_dups assemblies** The horizontal axis represents the contigs in the assemblies, the upper vertical axis represents the reference chromosome, and the bottom one shows the read depth for the contigs. The draft and purged primary assemblies are mapped to AgamP4 PEST reference assembly. **(a)**: Contig 50F, 21F and 57F are aligned to 23-28 Mb region of chromosome 3L on PEST genome. Two overlaps are found, the read depth of the corresponding regions also drops to half of the normal diploid coverage. **(b)**: In the HaploMerger assembly, both overlaps are removed, and the read depth goes back to normal. **(c)**: After purging with purge\_dups, the overlaps are removed perfectly, and the read depth becomes even at the diploid level.

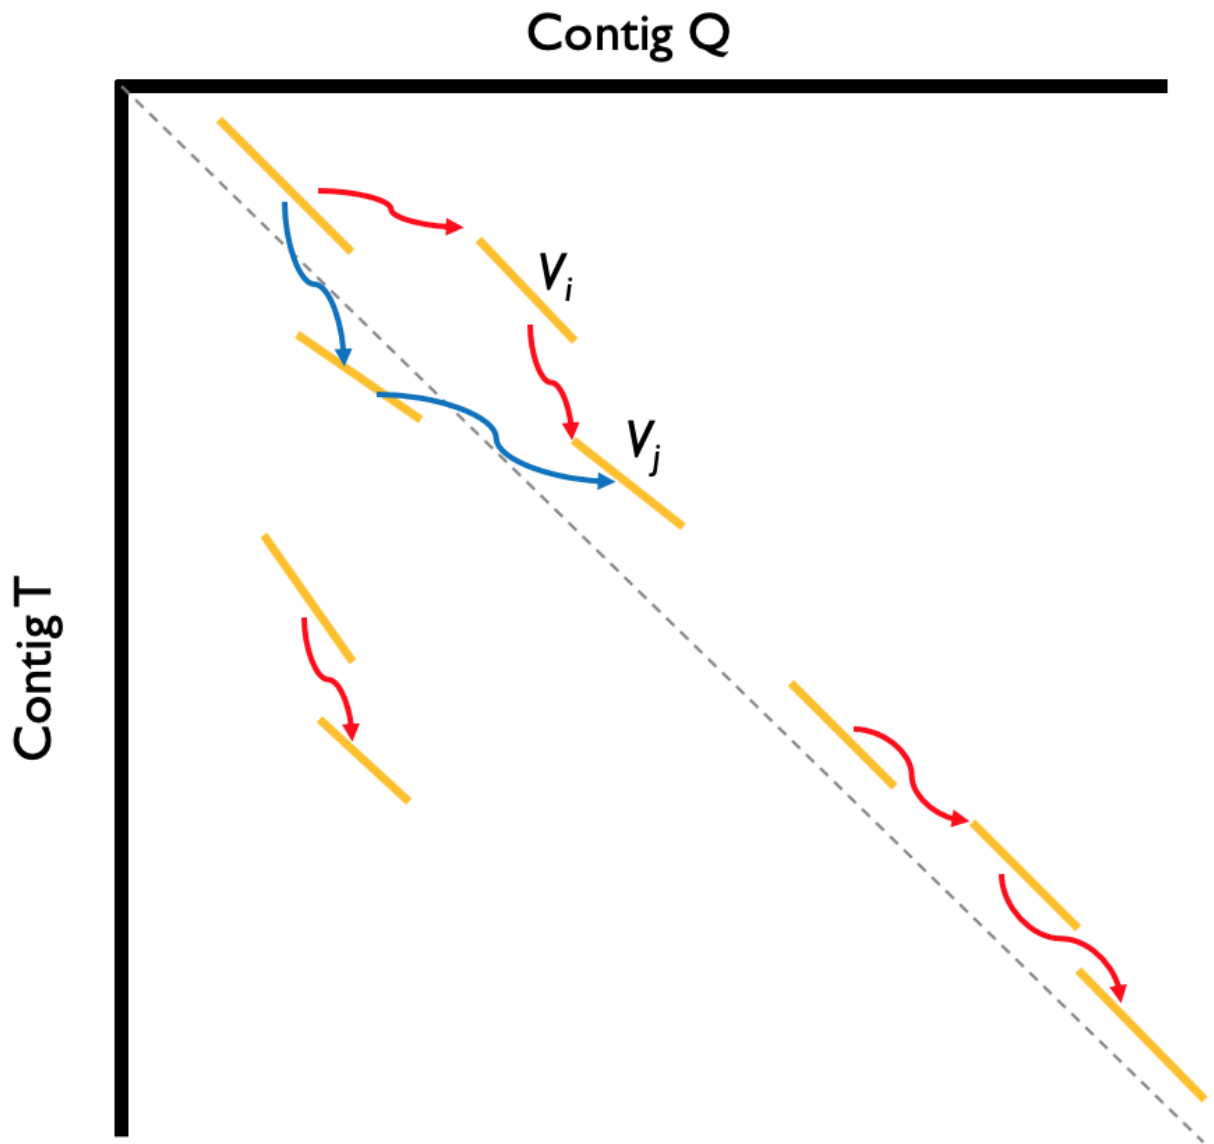

Supplementary Figure 5: **Illustration of chaining algorithm.** Vertices representing the matches are the lines in orange, edges are shown in red and blue. Red edges are used to form a collinear match. Three collinear matching groups are found in this example.
